# Supplementary material for: Tb(iii)-functionalized MOF hybridized bis-crosslinked networked hydrogel luminescent films for arginine and dopamine hydrochloride sensing and anticounterfeiting
Source: Royal Society of Chemistry journal article supplement (doi:10.1039/d4tc03444a), 2024-11-11
Supplement: d4tc03444a1.pdf [file d4tc03444a1.pdf]

## Supporting Information

### **Tb(III)-Functionalized MOF Hybridized Bis-crosslinked Networked Hydrogel Luminescent Films for Arginine and Dopamine Hydrochloride Sensing and Anticounterfeiting**

*Jiaxuan Pan<sup>1</sup>, Jiazhen Lu<sup>1</sup>, Yichen Shang<sup>1</sup>, Ying Li<sup>1, \*</sup> and Bing Yan<sup>2, \*</sup>*

*<sup>1</sup> School of Materials and Chemistry, University of Shanghai for Science and  
Technology, Shanghai 200093, P. R. China*

*<sup>2</sup> Shanghai Key Lab of Chemical Assessment and Sustainability, School of Chemical  
Science and Engineering, Tongji University, Shanghai 200092, China*

\* Correspondence: liying@usst.edu.cn. (Y.Li); byan@tongji.edu.cn (B. Yan)

## 1. Instruments

Fourier transform infrared (FT-IR) spectra were obtained by using the SPECTRUM 100 instrument provided by PerkinElmer, employing the KBr pellet Pressing method. X-ray photoelectron spectroscopy (XPS) analysis was conducted using the K-Alpha+ instrument from Thermo Fisher Scientific. The X-ray source utilized was a monochromatic Al K $\alpha$  source. Scanning electron microscopy (SEM) measurements and energy-dispersive spectroscopy (EDS) were performed using a Sigma 300 instrument with an accelerating voltage of 10 kV. The RF-5301 fluorescence spectrophotometer provided by Shimadzu Corporation, Japan, was employed to acquire excitation and emission spectra. A steady-state transient fluorescence spectrometer (Edinburgh FLS1000) was used to obtain the fluorescence lifetime and quantum yield data. X-ray diffraction (XRD) analysis utilized a BRUKER-supplied D8 ADVANCE instrument with monochromatic Cu K $\alpha$  excitation. Data were acquired at a 2° min<sup>-1</sup> scanning rate within the 5° < 2 $\theta$  < 25° range. A steady-state transient fluorescence spectrometer (Edinburgh FLS1000) was used to obtain the fluorescence lifetime and quantum yield data.

## 2.Supporting Figures and Tables

**a**

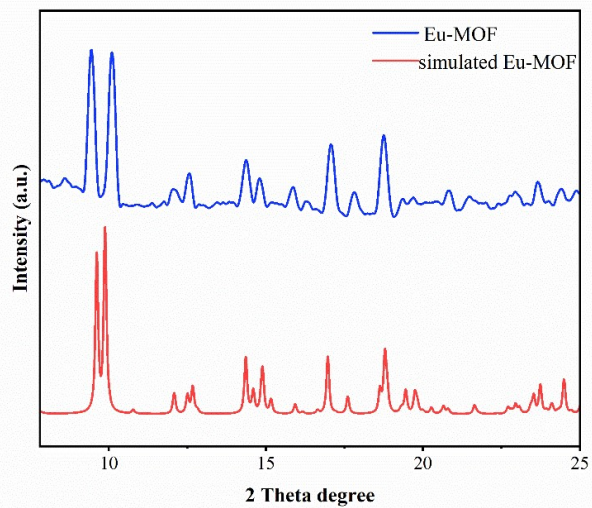

**b**

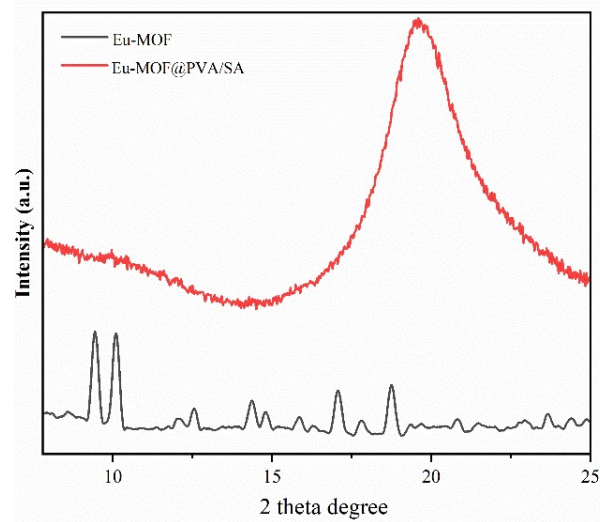

**Figure S1(a)** XRD patterns of Eu-MOF and Simulated Eu-MOF. **(b)**Eu-MOF@PVA/SA and Eu-MOF

**a**

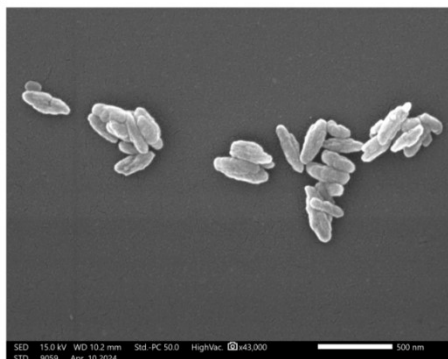

**b**

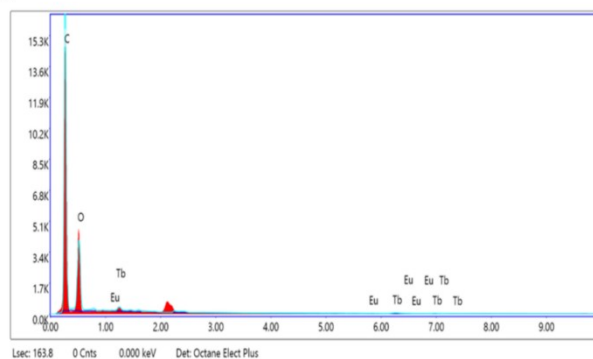

Figure S2 (a). SEM picture of Eu-MOF, (b). EDS energy spectra of Tb@Eu-MOF@PVA/SA

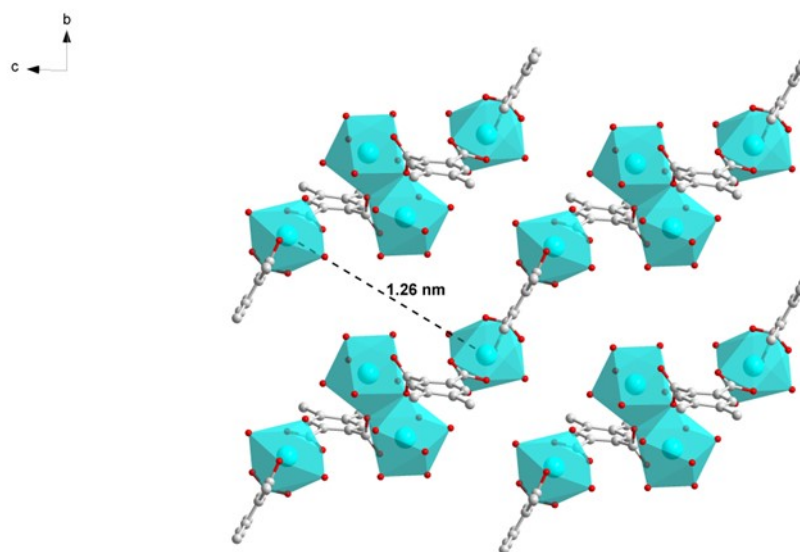

Figure S3: the simulated 3D structure of Eu-MOF (CCDC:862207)

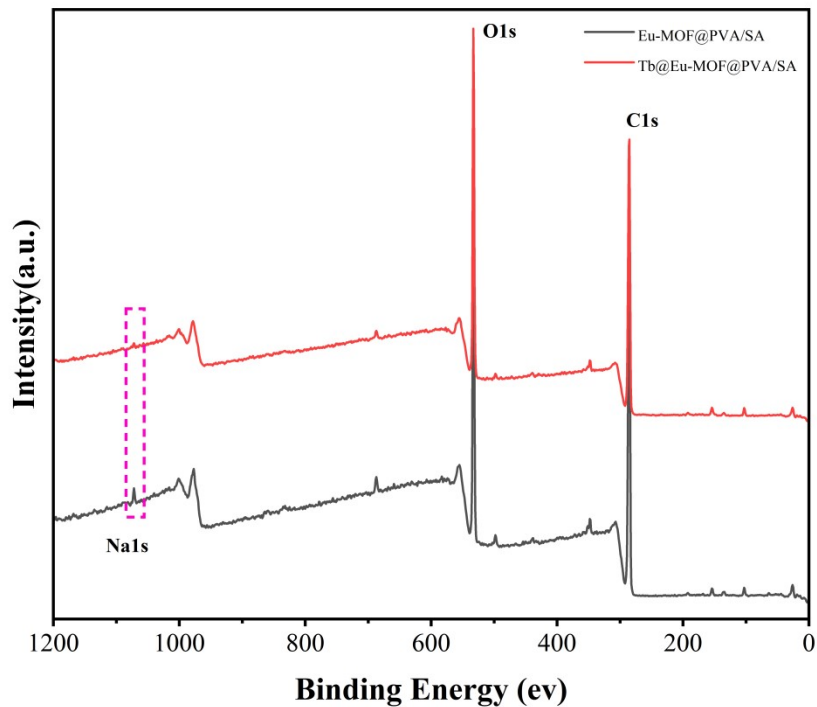

Figure S4 XPS spectra of Eu-MOF@PVA/SA and Tb@Eu-MOF@PVA/SA

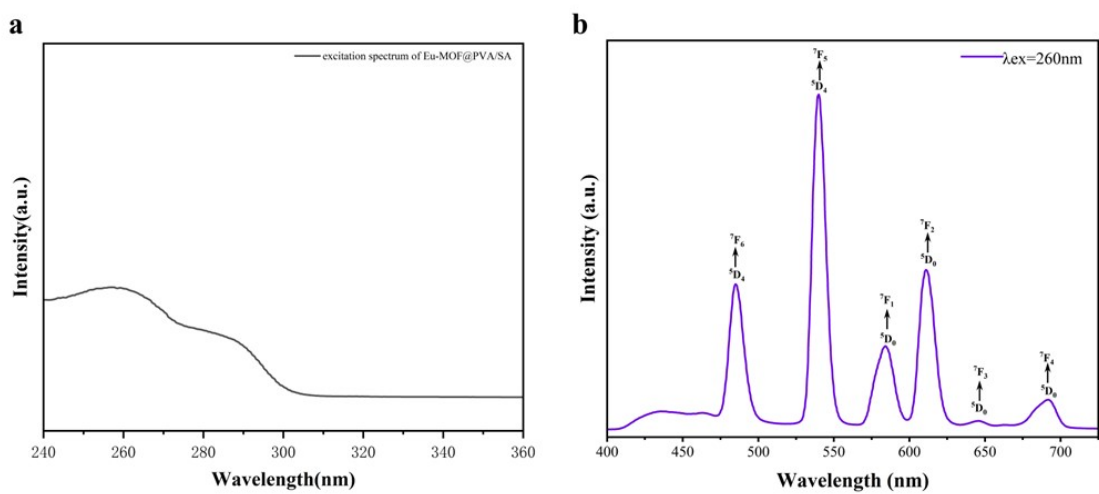

**Figure S5.** (a) Excitation spectra of Eu-MOF@PVA/SA, (b) The emission spectrum of Tb@Eu-MOF@PVA/SA ( $\lambda_{ex} = 260\text{ nm}$ ).

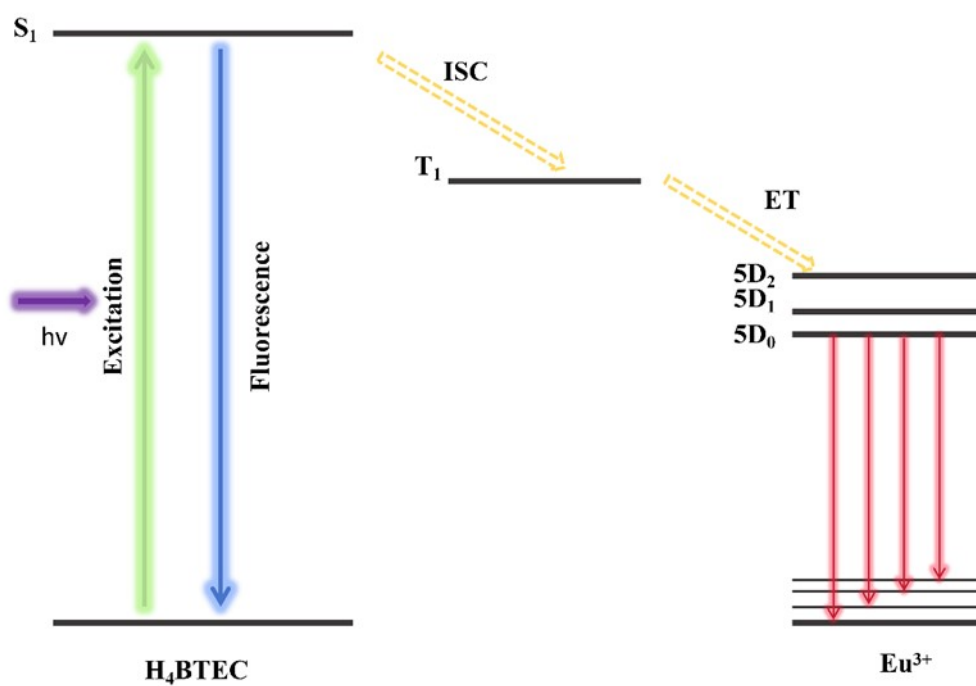

**Figure S6** Jablonsky level diagrams of Eu-MOF.

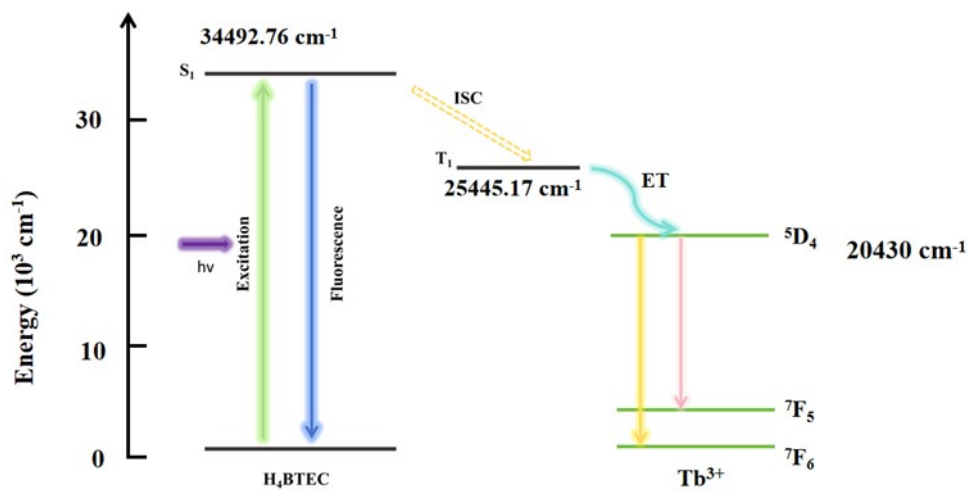

**Figure S7** schematic diagram of the antenna effect of the ligand with Tb<sup>3+</sup>

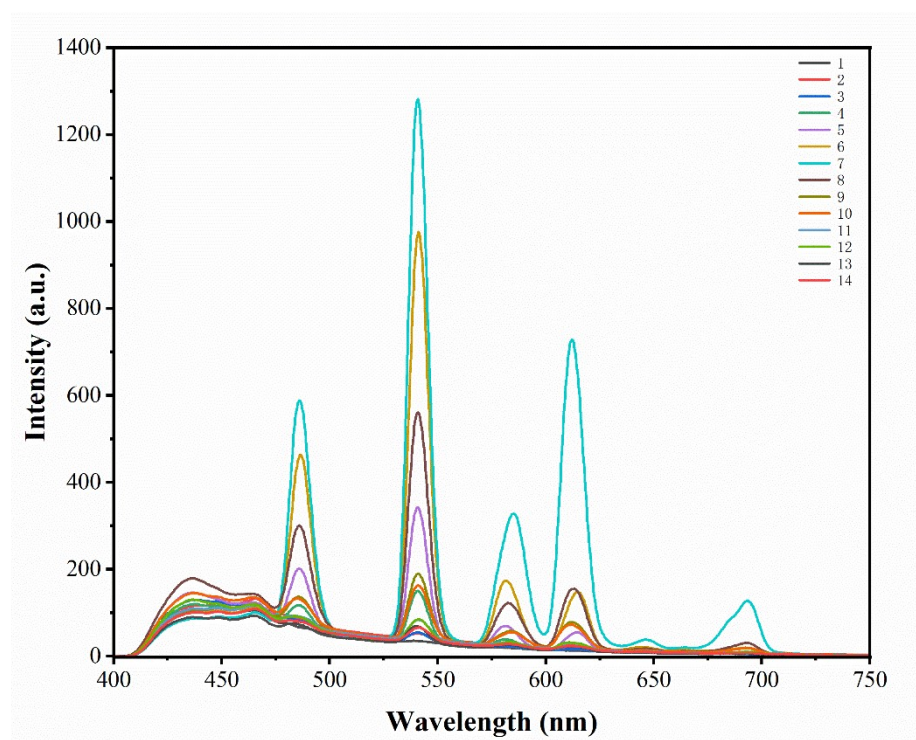

**Figure S8** Comparison of fluorescence intensity of Tb@Eu-MOF@PVA/SA in different PH solutions.

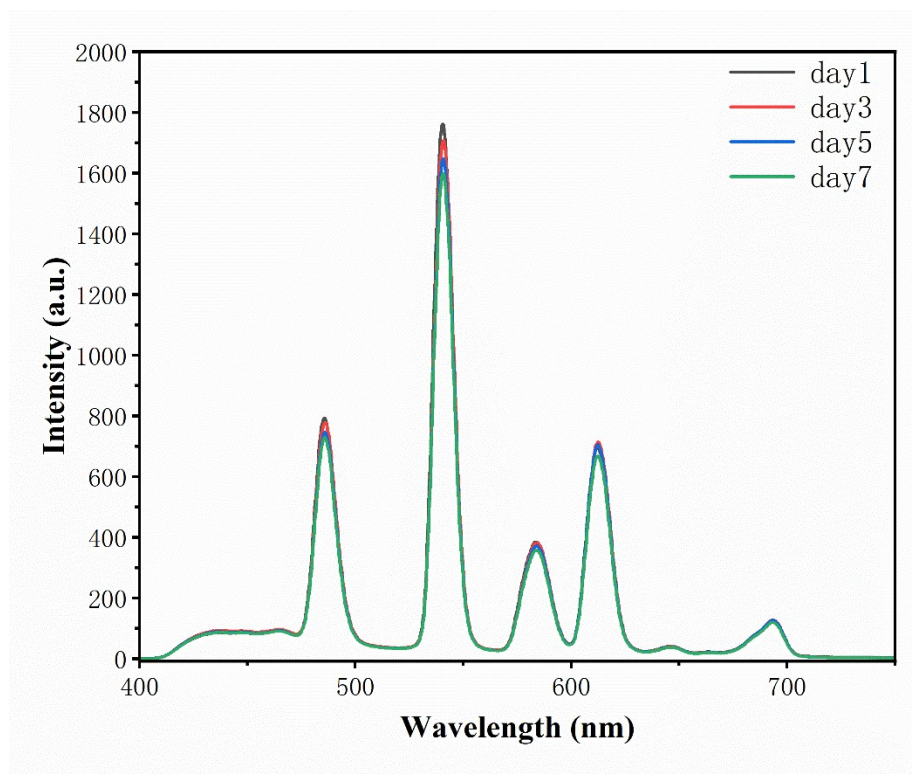

**Figure S9** The fluorescence changes of Tb@Eu-MOF@PVA/SA on days 1, 3, 5, and 7 in the air at room temperature.

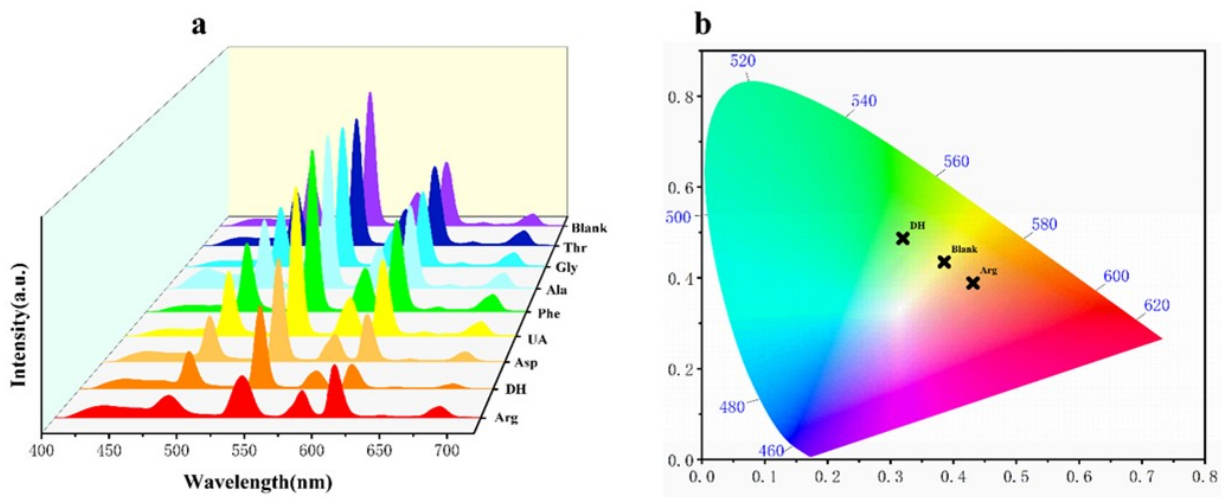

**Figure S10** (a) Emission spectra ( $\lambda_{\text{ex}} = 260 \text{ nm}$ ) of Tb@Eu-MOF@PVA/SA in various species solution (1mM), (b) the corresponding CIE coordinates of Tb@Eu-MOF@PVA/SA in Arg or DH solution

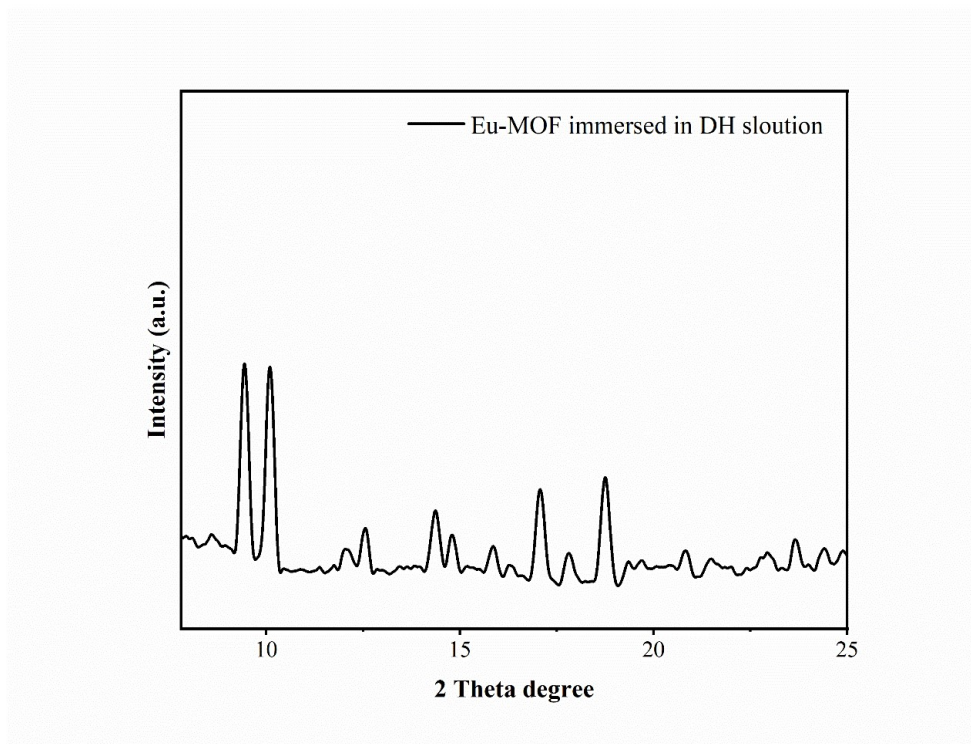

**Figure S11** The XRD patterns of Eu-MOF with the DH treatment



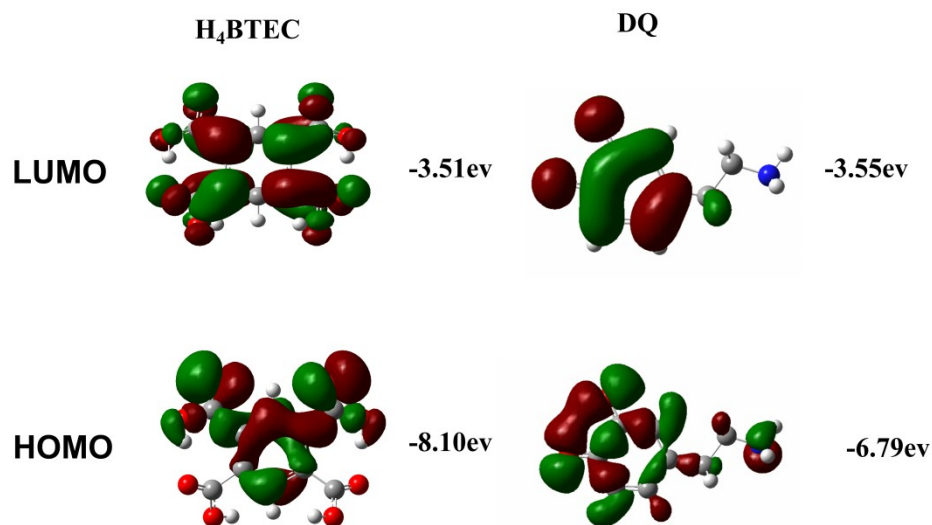

**Figure S12** LUMO and HOMO orbitals of the H<sub>4</sub>BTEC and DQ model.

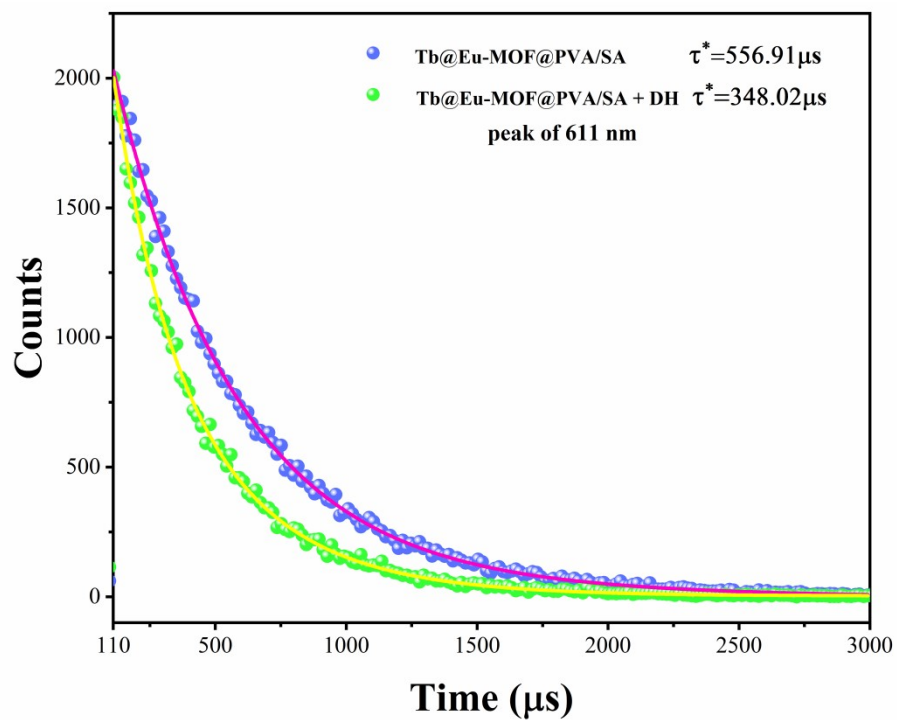

**Figure S13** Lifetime decay curves of Tb@Eu-MOF@PVA/SA at 611 nm in the absence and presence of DH

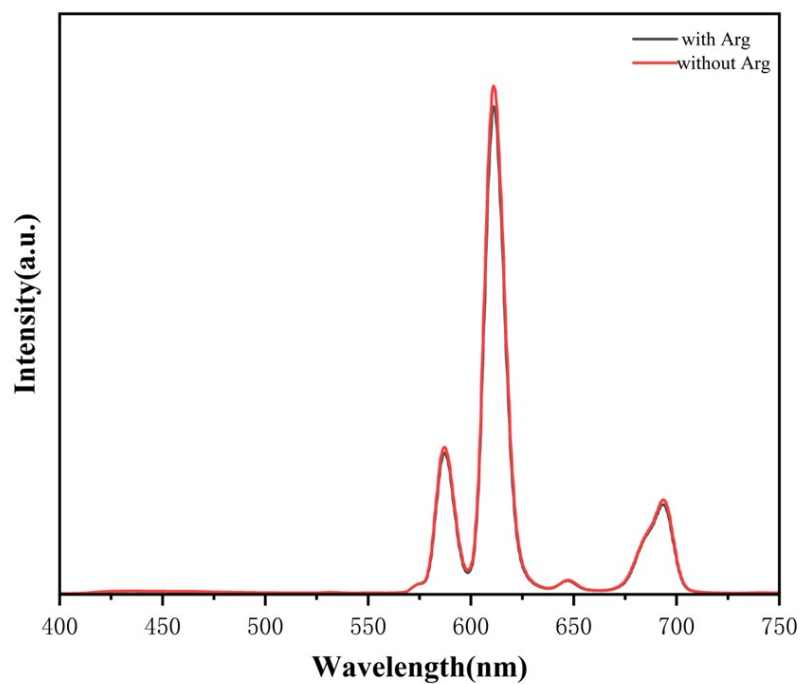

**Figure S14** Emission spectra ( $\lambda_{\text{exc}} = 260 \text{ nm}$ ) of Eu-MOF with Arg and without Arg

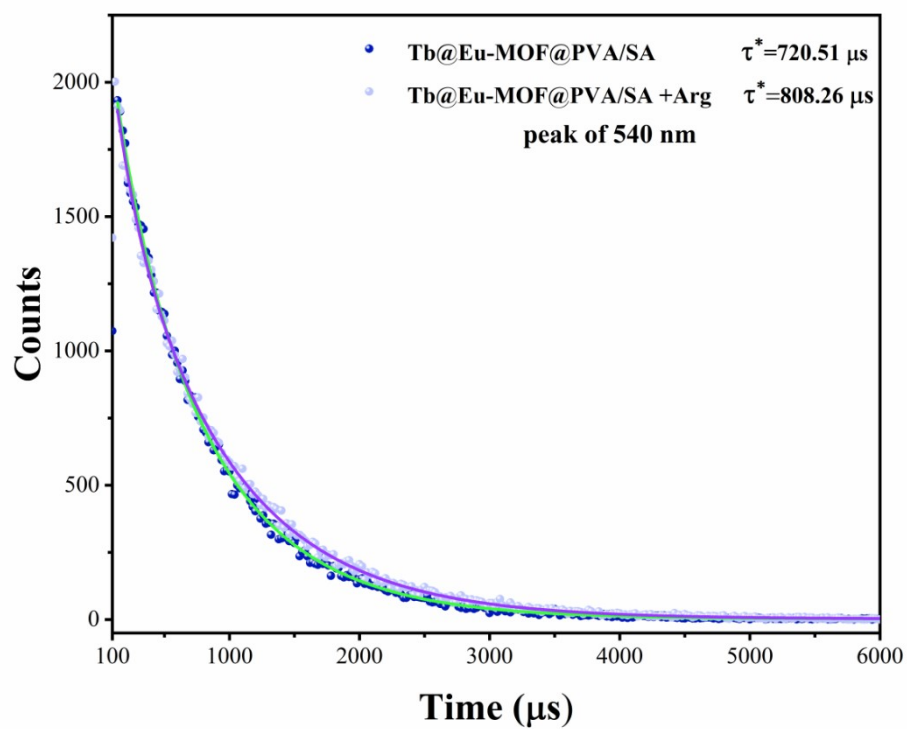

**Figure S15** Lifetime decay curves of Tb@Eu-MOF@PVA/SA at 540 nm in the absence and presence of Arg

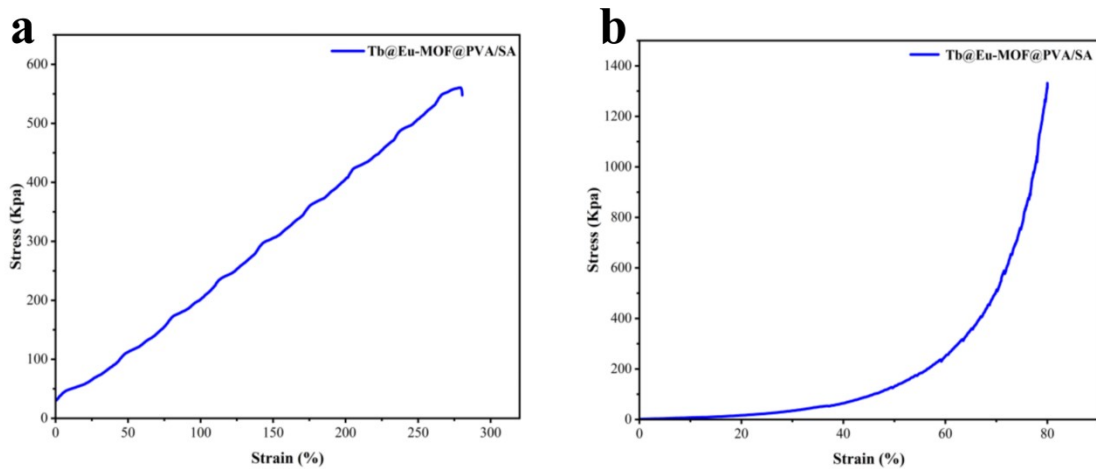

**Figure S16** (a)Tensile stress-strain curve of Tb@Eu-MOF@PVA/SA, (b)Stress-strain curve of Tb@Eu-MOF@PVA/SA at 80 % compression variable

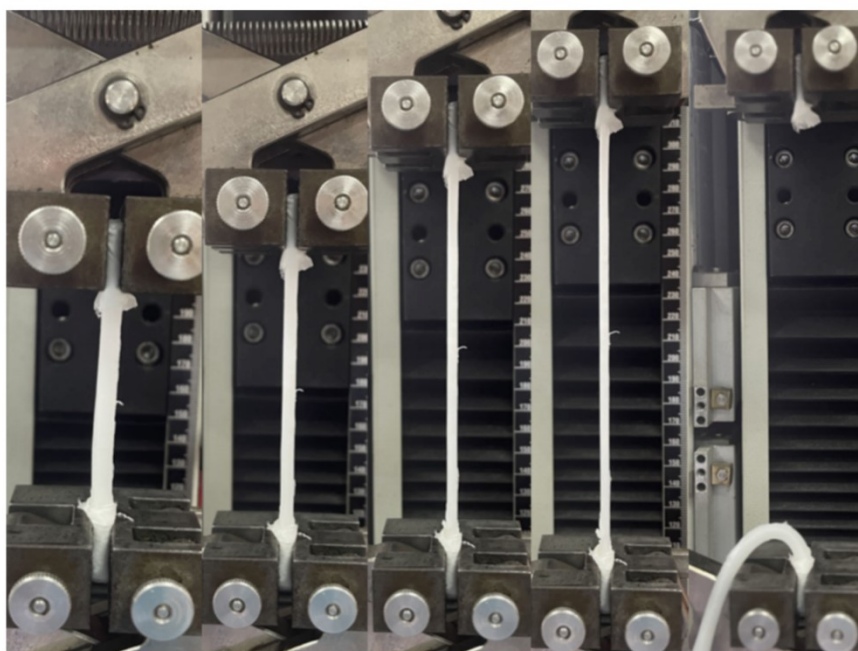

**Figure S17** photos of Tb@Eu-MOF@PVA/SA stretching process.

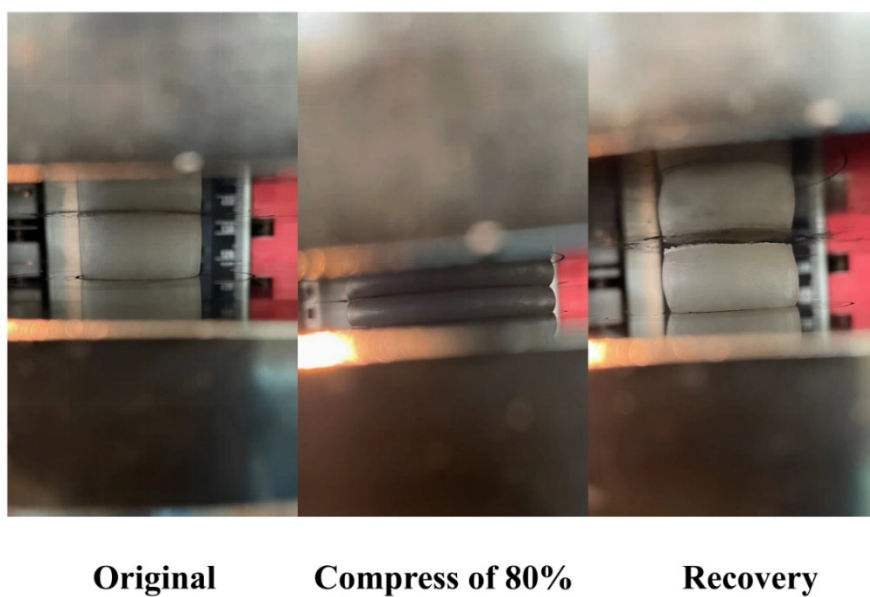

**Figure S18** photos of Tb@Eu-MOF@PVA/SA compression and recovery process

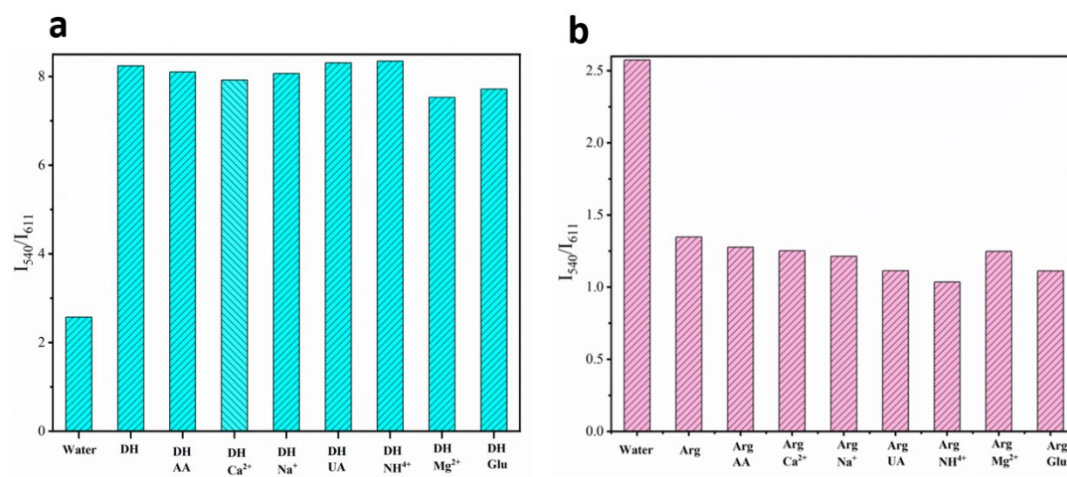

**Figure S19:** The anti-interference performance of Tb@Eu-MOF@PVA/SA for (a)DH

detection and (b)Ar

**Table S1** Analysis report of the EDS energy spectra of Tb@Eu-MOF@PVA/SA.

| Material         | Element | Weight% |
|------------------|---------|---------|
|                  | C       | 69.58   |
|                  | O       | 23.31   |
|                  | Eu      | 1.09    |
| Tb@Eu-MOF@PVA/SA | Tb      | 6.02    |
